# Supplementary material
Source: ML conference proceedings conference paper supplement (https://openreview.net/forum?id=wzPcffMZ3b)

# Australian

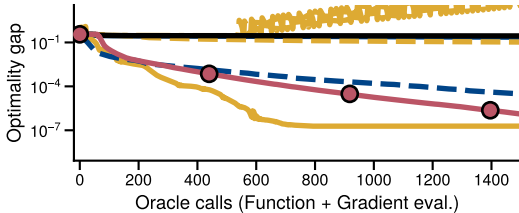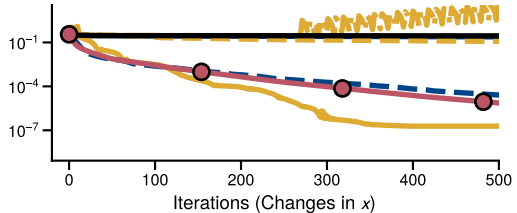

Supplement: supplementary_material [file attachment]

# Breast-cancer

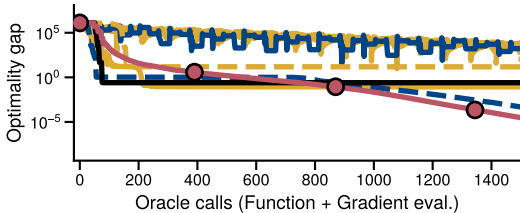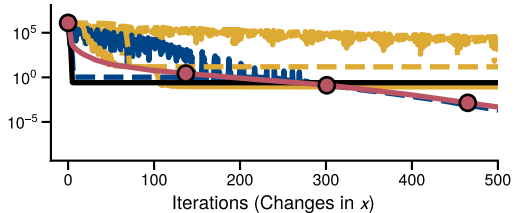

Supplement: supplementary_material [file attachment]

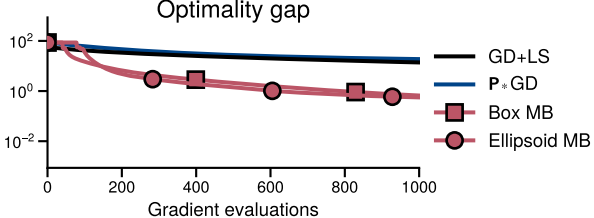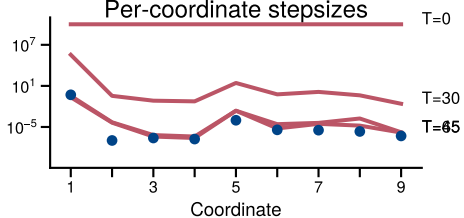

Supplement: supplementary_material [file attachment]

cpusmall

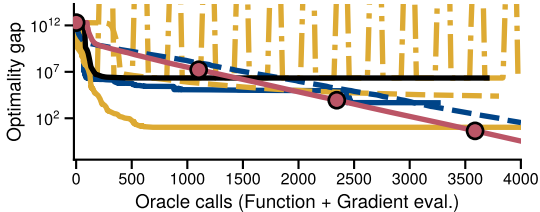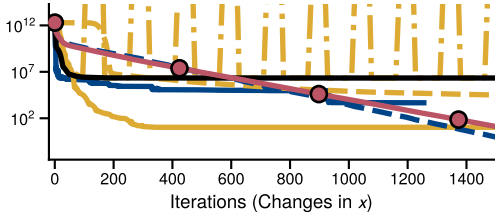

Supplement: supplementary_material [file attachment]

# Concrete

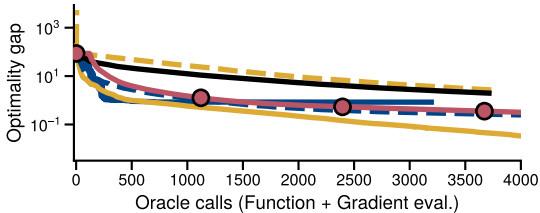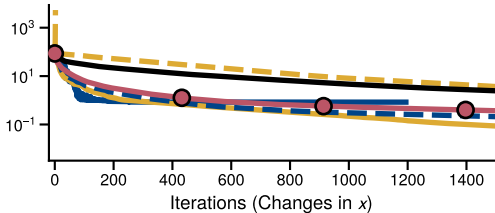

Supplement: supplementary_material [file attachment]

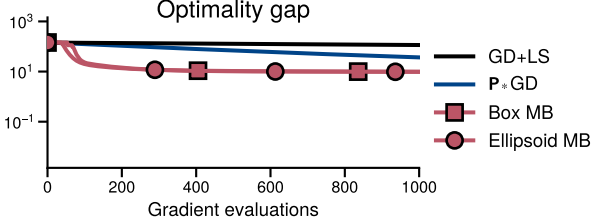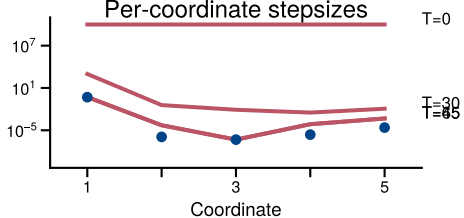

Supplement: supplementary_material [file attachment]

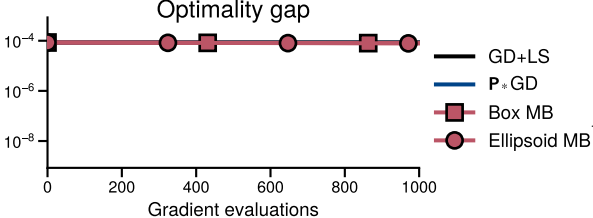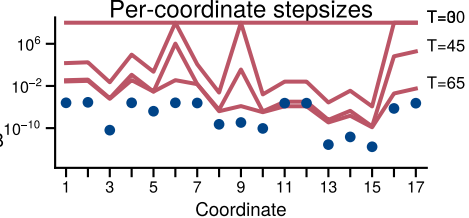

Supplement: supplementary_material [file attachment]

# News20

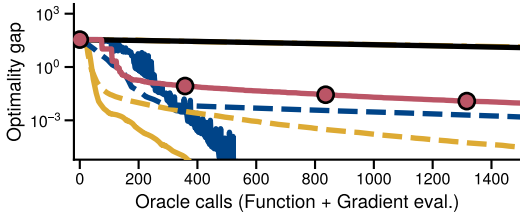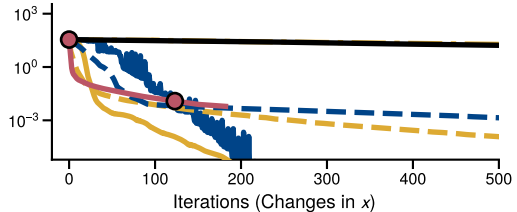

Supplement: supplementary_material [file attachment]

Mg

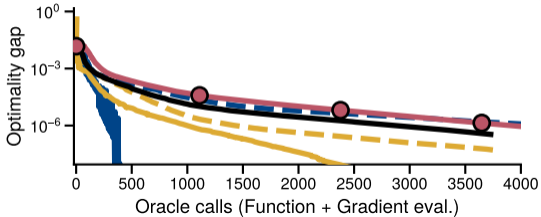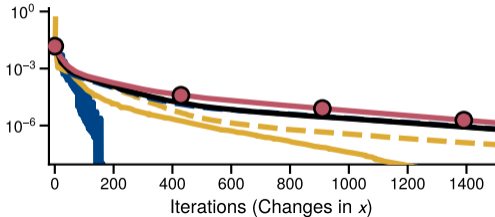

Supplement: supplementary_material [file attachment]

# Concrete

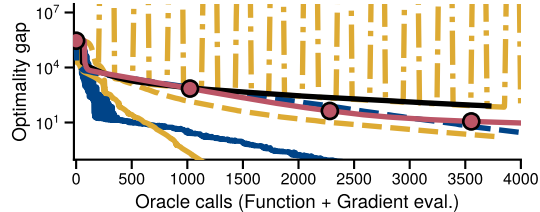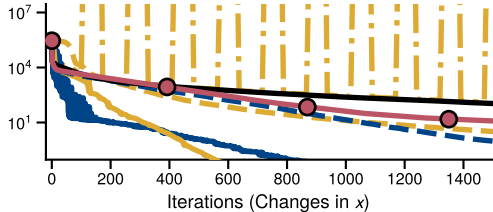

Supplement: supplementary_material [file attachment]

# Diabetes

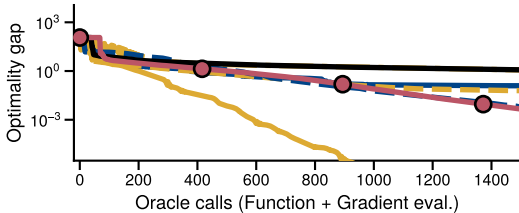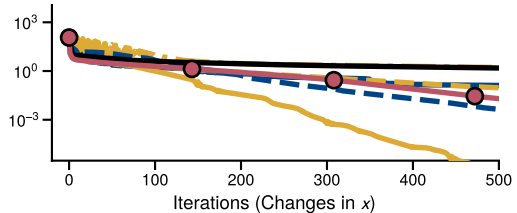

Supplement: supplementary_material [file attachment]

# Diabetes

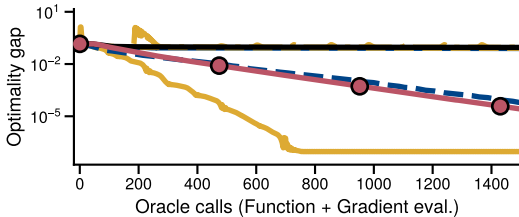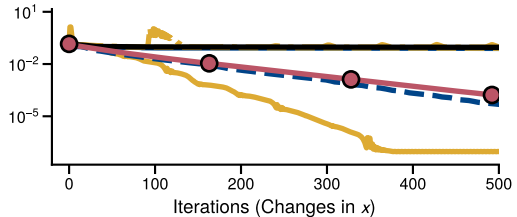

Supplement: supplementary_material [file attachment]

# Ionosphere

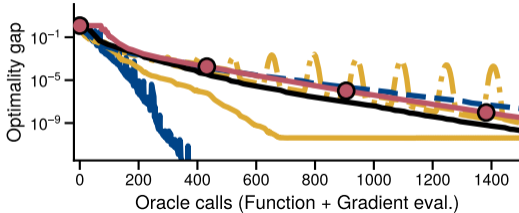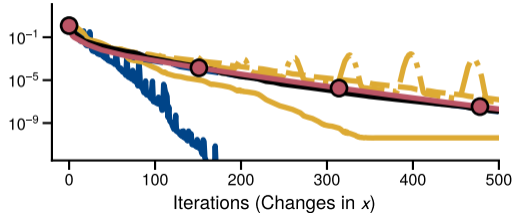

Supplement: supplementary_material [file attachment]

News20

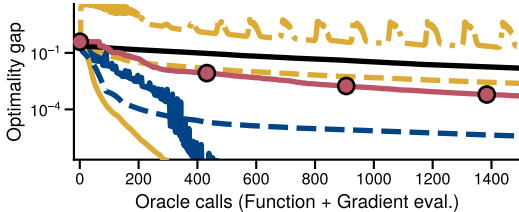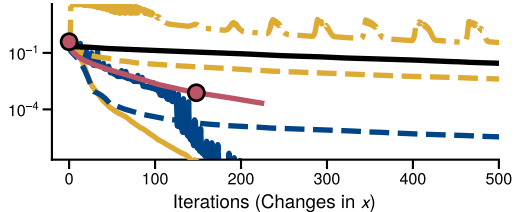

Supplement: supplementary_material [file attachment]

# RCV1

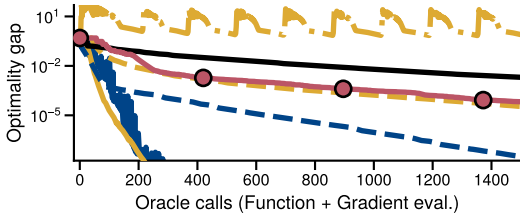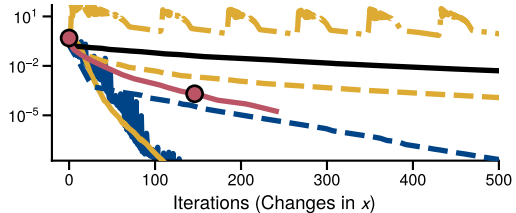

Supplement: supplementary_material [file attachment]

# cpusmall

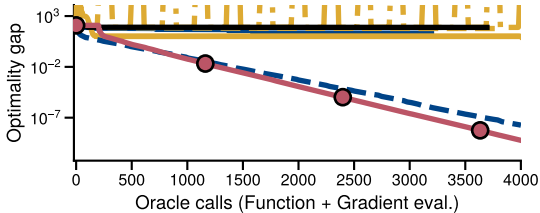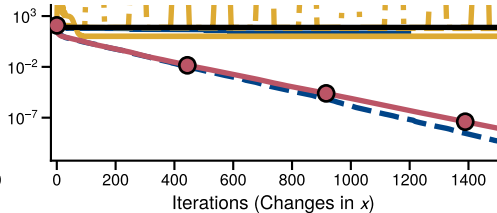

Supplement: supplementary_material [file attachment]

# Power-plant

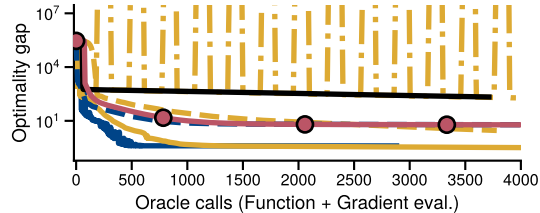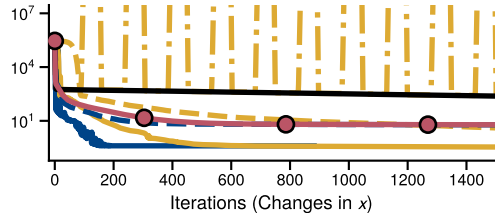

Supplement: supplementary_material [file attachment]

# Ionosphere

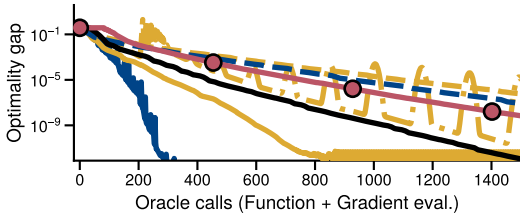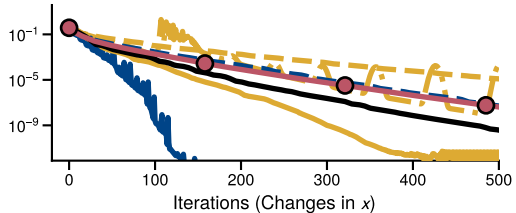

Supplement: supplementary_material [file attachment]

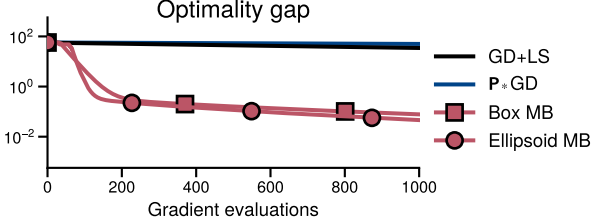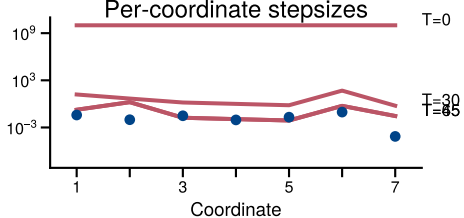

Supplement: supplementary_material [file attachment]

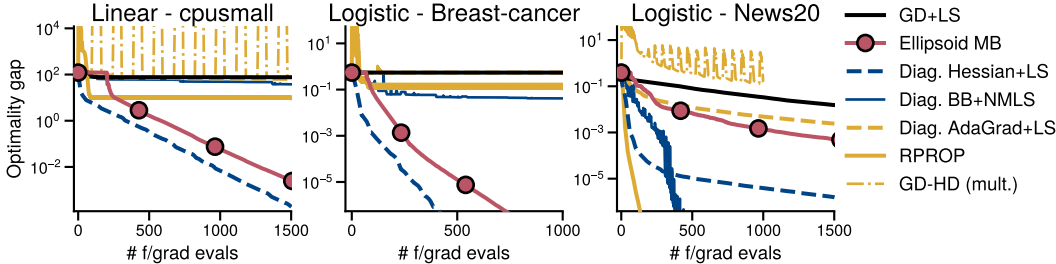

Supplement: supplementary_material [file attachment]

Mg

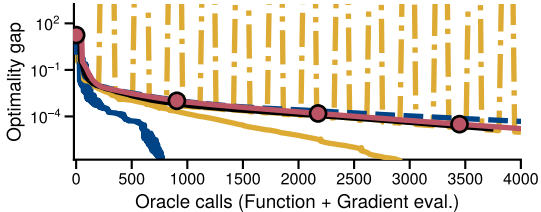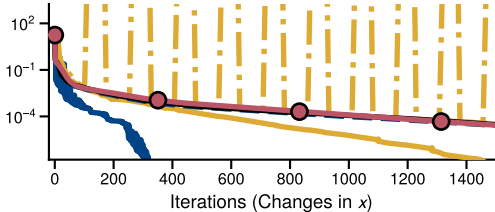

Supplement: supplementary_material [file attachment]

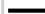

GD+LS

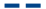

Diag. Hessian+LS

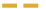

Diag. AdaGrad+LS

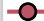

Ellipsoid MB

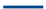

Diag. BB+NMLS

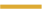

RPRROP

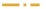

GD-HD (mult.)

Supplement: supplementary_material [file attachment]

# California-housing

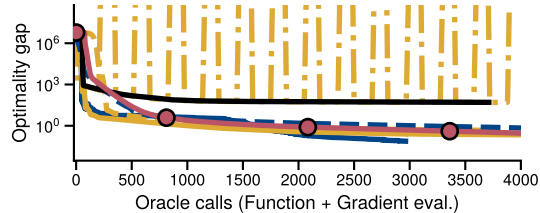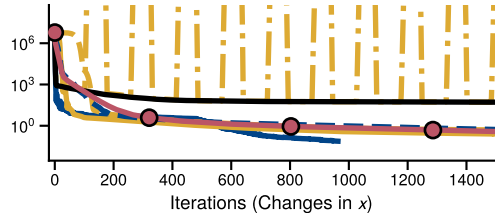

Supplement: supplementary_material [file attachment]

# Heart

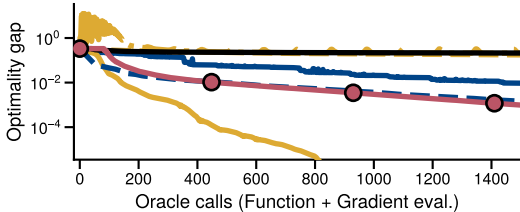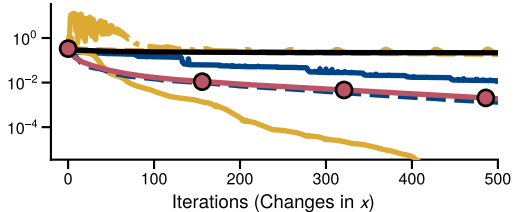

Supplement: supplementary_material [file attachment]

# Power-plant

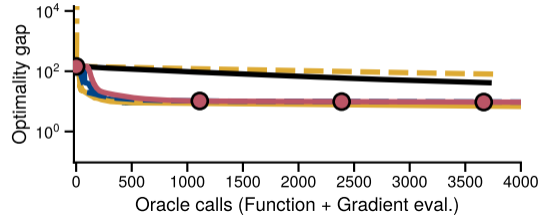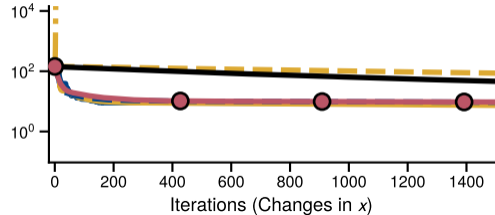

Supplement: supplementary_material [file attachment]

# Heart

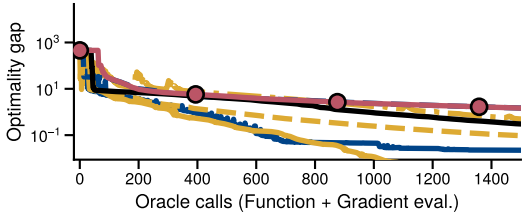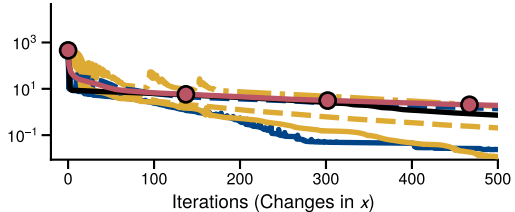

Supplement: supplementary_material [file attachment]

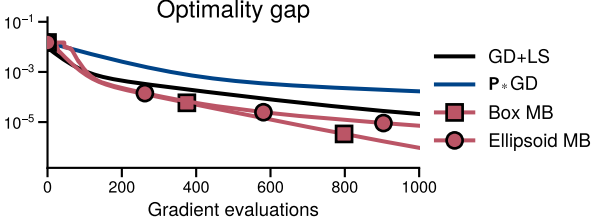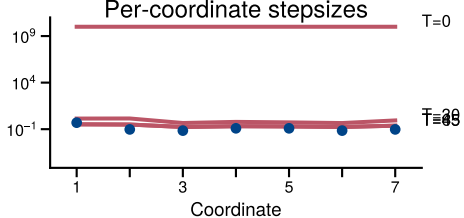

Supplement: supplementary_material [file attachment]

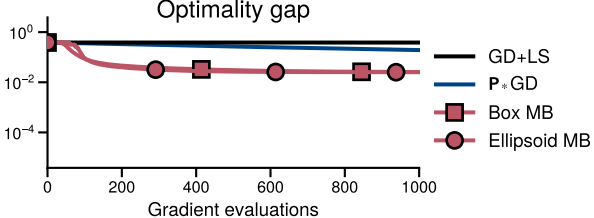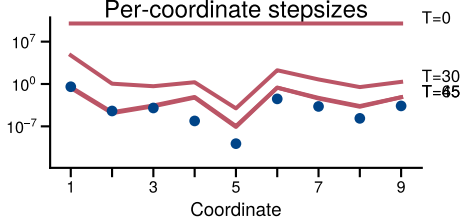

Supplement: supplementary_material [file attachment]

# Australian

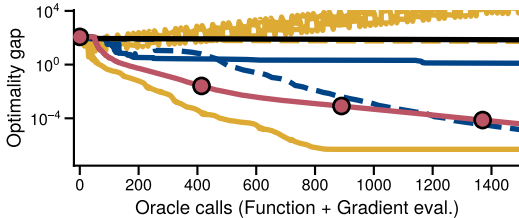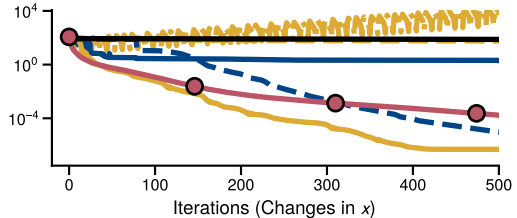

Supplement: supplementary_material [file attachment]

# RCV1

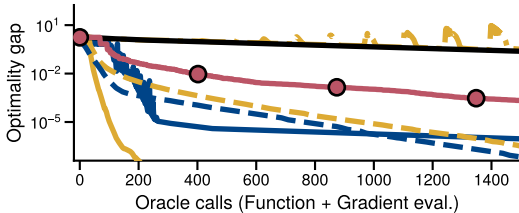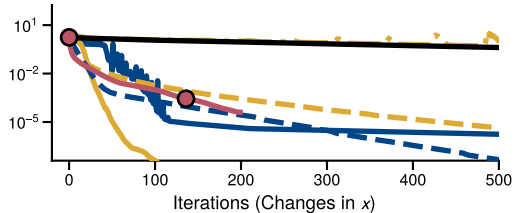

Supplement: supplementary_material [file attachment]

# Breast-cancer

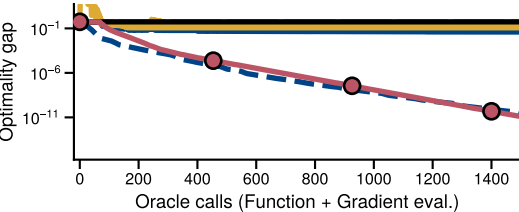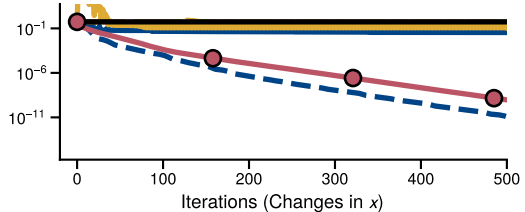

Supplement: supplementary_material [file attachment]

# California-housing

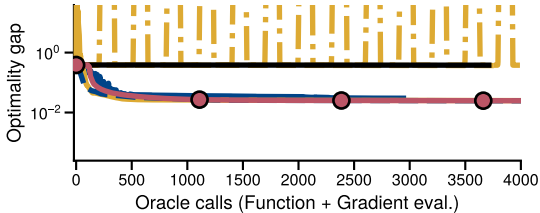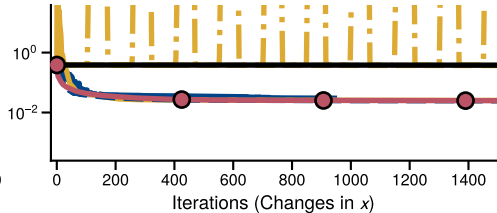

Supplement: supplementary_material [file attachment]
